# Supplementary material for: Rechtsschutz bei überlangen Gerichtverfahren - nach langem Weg ins Ziel?
Source: Royal Society of Chemistry journal article supplement (doi:10.1039/c3an00487b), 2011-01-01
Supplement: c3an00487b.pdf [file c3an00487b.pdf]

## **Preparation of copper oxide anchored on surfactant-functionalized macroporous carbon composite and its electrochemical applications**

### **Experimental Section**

#### **Materials**

Copper nitrate ( $\text{Cu}(\text{NO}_3)_2 \cdot 3\text{H}_2\text{O}$ ) and Sodium dodecyl sulphate (SDS) were obtained from Beijing Chemical Co. Ltd. N,N'-dimethylformamide (DMF) (HPLC grade) and aminoethanol ( $\text{NH}_2\text{CH}_2\text{CH}_2\text{OH}$ ) (AE) were purchased from Sigma–Aldrich. Hydrous hydrazine ( $\text{N}_2\text{H}_4 \cdot \text{H}_2\text{O}$ , 80%) was obtained from Tianjin, China. The 0.1 M phosphate buffer solution (PBS pH 7.0), which was made up from  $\text{NaH}_2\text{PO}_4$ ,  $\text{Na}_2\text{HPO}_4$  and  $\text{H}_3\text{PO}_4$ , was employed as a supporting electrolyte. All other chemicals were at least of analytical grade. Aqueous solutions were prepared with doubly distilled water and stored in the shade.

#### **Apparatus**

All the electrochemical experiments were carried out on a computer-controlled CHI 830B electrochemical Analyzer (CH Instruments, Shanghai Chenhua Instrument Corporation, China). A conventional three electrode cell was used; bare or the modified glassy carbon electrode (GCE) was used as working electrodes, a platinum electrode was applied as the counter electrode and an Ag/AgCl (KCl-saturated) electrode served as a reference electrode. In this study, all the sample solutions were purged with purified nitrogen for 20 min to remove oxygen prior to the beginning of a series of experiments and all experiments were carried out at laboratory temperature. Scanning electron microscopy (SEM) images and energy dispersive X-ray

spectroscopy (EDX) were determined with a Philips XL-30 ESEM operating at 3.0 kV. Transmission electron microscope (TEM) images were obtained using a JEM-2100F transmission electron microscope JEOL (Japan) operating at 200 kV. Nitrogen adsorption-desorption isotherms were measured on ASAP 2020 Micromeritics (USA) at 77 K. X-Ray diffraction (XRD) patterns were obtained on an X-ray D/max-2200vpc (Rigaku Corporation, Japan) instrument operated at 40 kV and 20 mA using Cu K $\alpha$  radiation ( $k = 0.15406$  nm). X-ray photoelectron spectroscopy (XPS) was measured using Thermo ESCA LAB X-ray photoelectron spectrometer (USA). Electrochemical impedance spectroscopy (EIS) was conducted using a Par 2273 Potentiostats-Electrochemistry Workstation.

### **Preparation of the modified electrodes**

Prior to the modification, GCE (model CHI104, 3 mm diameter) was polished before each experiment with 1, 0.3 and 0.05  $\mu\text{m}$  alumina power, respectively, rinsed thoroughly with doubly distilled water between each polishing step, and then sonicated successively in 1 : 1 nitric acid, absolute alcohol, double distilled water. The cleaned electrode was dried with a high-purity nitrogen steam for the next modification. To prepare the modified electrodes, 2 mg of the as-prepared samples were dispersed into 1 mL DMF to give homogeneous suspension upon bath sonication. A 5  $\mu\text{L}$  of the suspension was dip-coated onto GCE and the electrode was then dried at room temperature.

### **Preparation of MPC**

The SiO<sub>2</sub> template was prepared by the typical Stöber's method<sup>1</sup>. The carbon was

introduced into the interstices of the template using the modified method of Jun et al<sup>2</sup>. In a typical synthesis, 2.0 g of sucrose was dissolved in 10 mL aqueous solution containing 0.15 mL of 98% H<sub>2</sub>SO<sub>4</sub>. 2.0 g of SiO<sub>2</sub> template was immersed into sucrose solution and kept in vacuum for 3 hours at room temperature for thorough impregnation. Then the mixture was heated at 100 °C for 6 hours, followed by heating at 160 °C for a further 6 hours for polymerization of sucrose. The solid was subsequently carbonized at 900 °C in N<sub>2</sub> for 3 hours in a tube oven. The SiO<sub>2</sub> template was then etched away by overnight dissolution in 10% aqueous HF to leave behind a macroporous carbon.

### **Preparation of CuO/SMPC**

First, 100 mg of the MPC was dispersed in 100 mL of deionized water with sonication in the form of 40-kHz ultrasonic waves at 100-W output power. Second, 11.2 mg of SDS was added as a surfactant with magnetic stirring at 50 °C for 1 h. Third, 50 mL, 4 mM of Cu(NO<sub>3</sub>)<sub>2</sub>·3H<sub>2</sub>O was added and dissolved with magnetic stirring at 50 °C for 1 h. Then 50 mL, 4 mM of AE was added dropwise into this suspension. Then, after vigorous stirring at room temperature for 2 days, the preformed Cu(OH)<sub>2</sub>/MPC nanocomposite was collected by filtration. The Cu(OH)<sub>2</sub>/MPC precipitate was washed with deionized water, and dried in a vacuum oven at 60 °C for 24 h. Finally, Cu(OH)<sub>2</sub>/MPC nanocomposite was transferred to a clean quartz boat and inserted into a tube furnace for heat treatment. The temperature of the furnace was raised from room temperature to 160 °C at the ascending rate of 2 °C min<sup>-1</sup> in air, and kept at 160 °C for 4 h to complete the dehydration. For

comparison, the CuO/MPC composite was prepared in the same way, except the MPC was functionalized by SDS.

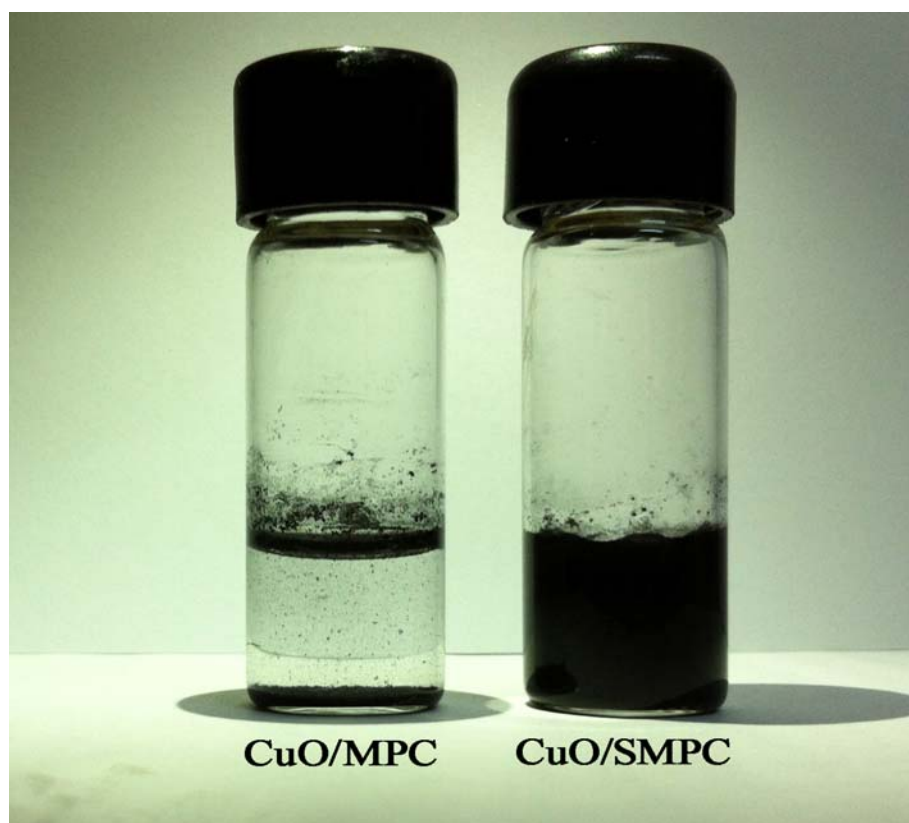

**Fig. S1** Photographs of MPC and SMPC dispersed in aqueous solution taken two days later.

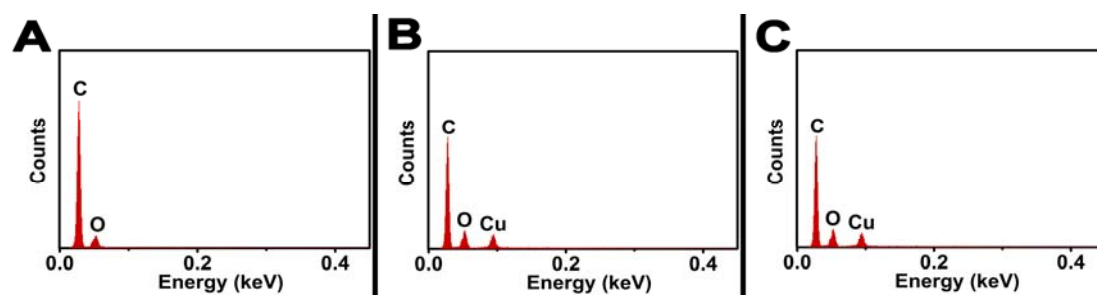

**Fig. S2** EDX spectra of MPC (A), CuO/MPC (B), and CuO/SMPC (C).

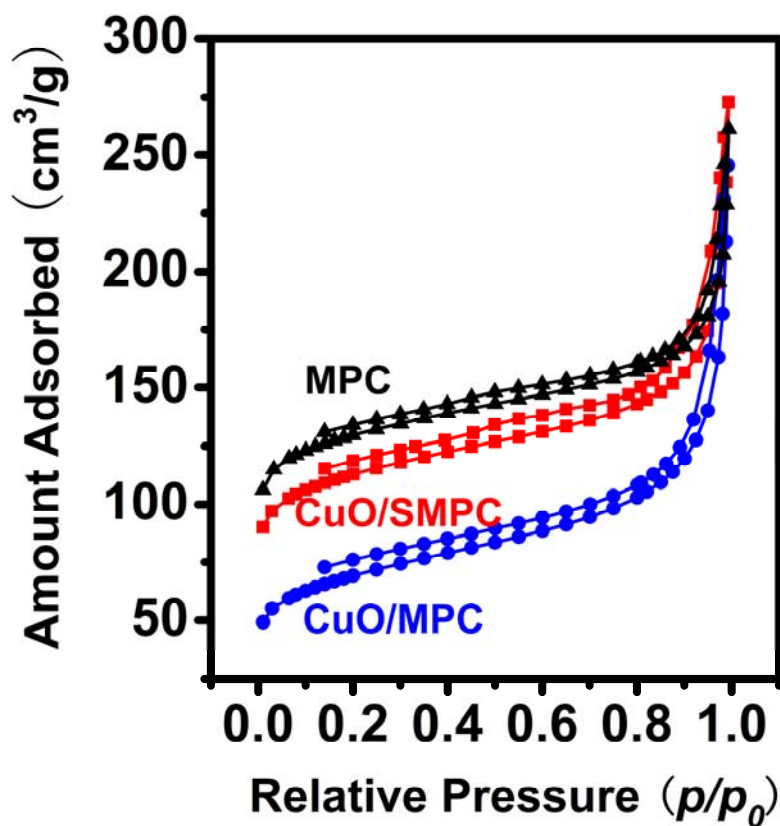

**Fig. S3** Nitrogen adsorption–desorption isotherms of the MPC (black line), CuO/MPC (blue line), and CuO/SMPC (red line).

**Table S1** BET surface areas of MPC, CuO/MPC, and CuO/SMPC

| Samples                                            | MPC   | CuO/MPC | CuO/SMPC |
|----------------------------------------------------|-------|---------|----------|
| S <sub>BET</sub> (m <sup>2</sup> g <sup>-1</sup> ) | 440.5 | 388.6   | 241.2    |

**Table S2** Comparison of the performances of modified electrodes used in the electroanalysis of hydrazine

| Working electrode                 | Applied potential (V) | Limit of detection ( $\mu\text{M}$ ) | Linear range ( $\mu\text{M}$ ) | sensitivity ( $\mu\text{A } \mu\text{M}^{-1}$ ) | Reference |
|-----------------------------------|-----------------------|--------------------------------------|--------------------------------|-------------------------------------------------|-----------|
| Manganese hexacyanoferrate        | 0.45                  | 6.65                                 | 33.3-8180                      | 47.53                                           | 3         |
| Polypyridil and phosphine Ru (II) | 0.75                  | 1                                    | 6-1200                         | NO                                              | 4         |
| CuO hollow sphere modified Si     | 0.7                   | 0.25                                 | 1-5000                         | 218                                             | 5         |
| PNWs-Nafion/GCE                   |                       |                                      |                                |                                                 |           |
| GCE/ZnO/MWCNTs                    | 0.4                   | 0.18                                 | 0.6–250                        | 17.47                                           | 6         |
| PGE/nano-Rh/CNF                   | 0.4                   | 0.3                                  | 0.5–175                        | 37.42                                           | 7         |
| PCF                               | 0.5                   | 0.14                                 | 1–550                          | 14.56                                           | 8         |
| CPE/NiHCF/AuNP                    | 0.3                   | 0.1                                  | 0.5-900                        | 52.99                                           | 9         |
| Co-GE/GCE                         | 0.3                   | 0.1                                  | 0.25–370, 370–2200             | 39.93                                           | 10        |
| CuO/MPC                           | 0.6                   | 2.82                                 | 10-1700                        | 20.32                                           | This work |
| CuO/SMPC                          | 0.4                   | 0.15                                 | 0.5-20 20-3000                 | 1826.13 261.19                                  | This work |

## References

1. S. Jun, J. Sang Hoon, R. Ryoo, M. Kruk, M. Jaroniec, Z. Liu, T. Ohsuna and O. Terasaki, *J. Am. Chem. Soc.*, 2000, **122**, 10712-10713.
2. W. Stöber, A. Fink and E. Bohn, *J. Colloid Interface Sci.*, 1968, **26**, 62-69.
3. Y. He, J. Zheng and S. Dong, *Analyst*, 2012, **137**, 4841-4848.
4. P. C. Pandey and A. K. Pandey, *Analyst*, 2012, **137**, 3306-3313.
5. M. Hadi, A. Rouhollahi and M. Yousefi, *Sens. Actuators, B*, 2011, **160**, 121-128.
6. G. Hu, Z. Zhou, Y. Guo, H. Hou and S. Shao, *Electrochem. Commun.*, 2010, **12**, 422-426.
7. B. Fang, C. Zhang, W. Zhang and G. Wang, *Electrochim. Acta*, 2009, **55**, 178-182.
8. A. Abbaspour, M. Shamsipur, A. Siroueinejad, R. Kia and P. R. Raithby, *Electrochim. Acta*, 2009, **54**, 2916-2923.
9. D. Jayasri and S. S. Narayanan, *J. Hazard. Mater.*, 2007, **144**, 348-354.
10. Z. Guo, M. L. Seol, M. S. Kim, J. H. Ahn, Y. K. Choi, J. H. Liu and X. J. Huang, *Nanoscale*, 2012, **4**, 7525-7531.
